# Supplementary material
Source: Elsevier journal article supplement (https://www.sciencedirect.com/science/article/pii/S2530064417300640)
Supplement: mmc1 [file S2530064417300640:mmc1.docx]

**SECTION: Research Letters**

**Assessing the risk of invasion of species in the pet trade in Brazil**

Clarissa Alves da Rosa1, Rafael Zenni2, Sílvia R. Ziller3, Nelson de Almeida Curi2, Marcelo Passamani2

1InstitutoFauna Selvagem, Rua 3600, N° 232, 88330-248, Balneário Camboriú, Santa Catarina, Brazil.

2Programa de Pós-Graduação em Ecologia Aplicada, Setor de Ecologia, Departamento de Biologia, Universidade Federal de Lavras, Campus Universitário, 37200-000, Lavras, Minas Gerais, Brazil

3Instituto Hórus de Desenvolvimento e Conservação Ambiental, Servidão Cobra Coral, 111 - Campeche, 88.063-513, Florianópolis, SC

Corresponding Author2: Telephone +55 35 38291922; E-mail [alvesrosa_c@hotmail.com](mailto:alvesrosa_c@hotmail.com)

**Appendix A: Electronic Supplementary Material**

The questions used in the Risk Assessment For Non-Native Terrestrial Vertebrates from Pereira and Ziller (2008) are in Table 1. There are 39 questions divided into four sections: (1) biological and ecological features, (2) biogeographic features, (3) social and economic features, and (4) characteristics that potentialize risk (Table 1). The final risk rating is calculated from scores attributed to each answer, which vary according to the relevance and consistency of each question/feature in contributing to invasion success. The final rating indicates the risk of a species becoming invasive if released in nature or specific habitat types, according to each species. Questions are given different weights based on three levels of impact: high (5 points), medium (3 points) or low (1 point). These levels were set according to the potential competitive advantage of species traits if introduced to an ecosystem (e.g. species able to live in habitats with a wide spectrum of changes in temperature and/or humidity - question 4.03 - may have strong competitive advantage, so potential impact is considered high). The questions on "biogeographic aspects" are attributed high impact values because propagule pressure along with history of invasion, are the most consistent predictors of invasion to date (Lockwood et al. 2005). If one species is subjected to repeat introductions (question 5.01) the greater its propagule pressure (5 points) and the greater is the chance of establishment and invasion. If a species is already established in some other location (question 5.02) higher values are assigned (7 points). If the species has a history of invasion elsewhere (question 5.05), 10 points are added. Because mammals are generally successful invaders globally, they receive the highest risk score among terrestrial vertebrates (5.5 points). The protocol is valid if 70% of the questions in each category are answered and overall risk can be rated as very low (total score below 11 points), low (total score between 11 and 32 points), moderate (total score 32 and 45 points), high (between 45 and 65 points) or very high (total score above 65 points to a maximum of 150 points) (Pereira and Ziller, 2008).

The hedgehog *Erinaceus europaeus* (Table 2)*,* chipmunk *Tamias sibiricus* (Table 3), gerbil *Meriones unguiculatus* (Table 4)*,* sugar glide *Petaurus breviceps* (Table 5)*,* skunk *Mephitis mephitis* (Table 6) and stoat *Mustela erminea* (Table 7) risk assessments are provided.

Table 1: Risk Assessment For Non-Native Terrestrial Vertebrates from Pereira and Ziller (2008). With exception of question 9.01 all other questions requires yes/no answers.

| **THE HORUS INSTITUTE FOR ENVIRONMENTAL CONSERVATION AND DEVELOPMENT** | | | |
| --- | --- | --- | --- |
| **RISK ASSESSMENT FOR NON-NATIVE TERRESTRIAL VERTEBRATES** | | | |
| **S**e**ction** | **Group** |  | **Question** |
| **Biological and ecological features** | | | |
| A | Reproduction | 1.01 | Does the taxon practice parental care? |
| 1.02 | Does the taxon have a short juvenile period? |
| 1.03 | Does the taxon reproduce all year round (or more than once a year)? |
| 1.04 | Does the taxon produce large offspring at every reproductive cycle? |
| Feeding group | 2.01 | Is the taxon a carnivore? |
| 2.02 | Can the taxon spend long periods without feeding? |
| 2.03 | Does the taxon feed on or degrade vegetation? |
| 2.04 | Is the taxon an omnivore or generalist (feeds on more than one food type)? |
| Ecological interactions | 3.01 | Is the taxon aggressive or a predator of other animals? |
| 3.02 | Does the taxon defend its resources (nest or food) in its territory? |
| 3.03 | Is there any natural predator of the taxon in the area? |
| 3.04 | Does the taxon use any resource (food, space, shelter) that results in competition with indigenous species? |
| 3.05 | Does the taxon use any resistance strategy in adverse situations (hibernation, early reproduction, change in fur or feathers in winter)? |
| Habitat | 4.01 | Can the taxon cover long distances? |
| 4.02 | Is the taxon capable of living in anthropic habitats (such as gardens or plantations)? |
| 4.03 | Is the taxon capable of living in habitats with a wide variation in temperature or humidity, or withstand stress? |
| **Biogeographic features** | | | |
| B | Occurrences | 5.01 | Does the taxon have a history of repeated introductions outside its native range - intentional **introductions**? |
| 5.02 | Are there records that the taxon is established outside its historically known native range? |
| 5.03 | Is the taxon endemic in its native range? |
| 5.04 | Are there records of occurrence of the taxon in breeding facilities outside its native range? |
| 5.05 | Are there records that the species is invasive in habitats outside its native range? |
| **Social and economic features** | | | |
| C | Economic relevance | 6.01 | Can the taxon be (or is it) used in animal production, breeding sites or cultivation? |
| 6.02 | Does the taxon have ornamentally attractive traits for humans that favor its breeding? |
| 6.03 | Are there records of occurrence of this taxon in habitats close to its breeding grounds (or are there records of escape from breeding grounds - **accidental introductions**)? |
| Riks posed to humans | 7.01 | Is the taxon aggressive to humans or are there any records of accidents involving humans? |
| 7.02 | Is the taxon capable of inoculating toxins or does it have any type of poison that may be harmful to humans? |
| 7.03 | Can the breeding of this taxon cause any harm to public health or put people at risk (even if through escapes or production of feces)? |
| **Characteristics that potentialize risk** | | | |
| D | Contamination by pathogens or parasites | 8.01 | Is the taxon susceptible to, or could it transmit, any disease or parasite to other indigenous species of animals? |
| 8.02 | Are there records of epidemics in this taxon (or in the genus) caused by viruses, protozoans, fungi or other parasites in other regions? |
| Class  Attributes of persistence | 9.01 | Is the taxon a mammal, bird, amphibian or reptile? |
| 10.01 | Does any wild population of the species feed on or harm agricultural production (including damage caused by pollution with feces or urine, or nesting activities) |
| 10.02 | Would the taxon be able to spread invasive plants or weeds? |
| 10.03 | Is the taxon consumed as food by people? |
| 10.04 | Would the taxon be able to deform or cause physical damage to buildings or structures (fences, houses, water or light systems, other equipment)? |
| 10.05 | Is it viable and easy to apply control practices to the taxon at a reasonable cost? |
| Use and trade | 11.01 | Are there breeding sites or shops that legally commercialize the taxon? |
| 11.02 | Is there a large number of people who trade on, use or breed the taxon in the country (including animal trafficking)? |
| 11.03 | Is it easy for breeders to obtain permits for transporting the taxon? |
| 11.04 | Are there governmental incentives for breeding the taxon or for trade? |

Table 2: Risk Assessment (Pereira and Ziller, 2008) for invasion of the hedghog *Erinaceus europaeus* in Brazilian territory.

| **THE HORUS INSTITUTE FOR ENVIRONMENTAL CONSERVATION AND DEVELOPMENT** | | | | |
| --- | --- | --- | --- | --- |
| **RESULT** | | | | |
| **Pontuation: 81.5** | | | **Valid Avaliation (>70% of answers)** | **High Risk** |
| **RISK ASSESSMENT FOR NON-NATIVE TERRESTRIAL VERTEBRATES** | | | | |
| **Section** | **Group** |  | **Answers *Erinaceus europaeus*** | **References** |
| **Biological and ecological features** | | | | |
| A | Reproductive Mechanisms | 1.01 | Yes | (Long, 2003) |
| 1.02 | Yes | (Bunnell, 2009; Long, 2003) |
| 1.03 | No | (Long, 2003) |
| 1.04 | Yes | (Long, 2003) |
| Food Group | 2.01 | No | (Long, 2003) |
| 2.02 | Yes | (Fowler and Racey, 1987; Fowler and Racey, 1990; Long, 2003) |
| 2.03 | No | (Jones and Norbury, 2011) |
| 2.04 | Yes | (Jones et al., 2005) |
| Ecological Interactions | 3.01 | Yes | (Hagman et al., 2015; Jackson and Green, 2000; Jackson et al., 2004; Kross et al., 2013; Long, 2003; Pimentel, 2014) |
| 3.02 | No | (Hof and Bright, 2010; Moss and Sanders, 2001; Rondinini, 2007) |
| 3.03 |  |  |
| 3.04 | Yes | (Campbell, 1973) |
| 3.05 | Yes | (Fowler and Racey, 1987; Fowler and Racey, 1990; Long, 2003) |
| Hábitat | 4.01 | No | (Long, 2003; Morris et al., 1992; Moss, 1999; Moss and Sanders, 2001; Riber, 2006) |
| 4.02 | Yes | (Baker and Harris, 2007; Dowding et al., 2010; Haigh et al., 2009; Long, 2003) |
| 4.03 | Yes | (Fowler and Racey, 1987; Fowler and Racey, 1990; Long, 2003) |
| **Biogeographic features** | | | |  |
| B | Occurrence | 5.01 | Yes | (Long, 2003) |
| 5.02 | Yes | (Long, 2003) |
| 5.03 | No | (Amori et al., 2008; Long, 2003) |
| 5.04 | Yes | (Long, 2003) |
| 5.05 | Yes | (Amori et al., 2008; DAISIE, 2015; Long, 2003) |
| **Social and economic features** | | | |  |
| C | Economic importance of the taxon | 6.01 | No | We did not found reasons encouraging the creation of this taxon for the. Meat consumption) |
| 6.02 | Yes | (Long, 2003) |
| 6.03 | Yes | (Long, 2003) |
| Risk to People | 7.01 | No | There is no record |
| 7.02 | No | There are no records of toxins inoculated by this species |
| 7.03 | Yes | (Cirak et al., 2010; English and Morris, 1969; Krawczyket al., 2015; Long, 2003; Pimentel, 2014) |
| **Characteristics that potentialize risk** | | | |  |
| D | Contamination by Pathogens and Parasites | 8.01 | Yes | (Cirak et al., 2010; English and Morris, 1969; Krawczyket al., 2015; Long, 2003; Pimentel, 2014) |
| 8.02 |  |  |
| Persistence Attributes | 9.01 | Mammal | (Long, 2003) |
| 9.02 | No | (Moss and Sanders, 2001) |
| 9.03 |  |  |
| 9.04 | No | We did not find usage records for human consumption |
| 9.05 |  |  |
| 9.06 | No | (Griffiths et al., 2015) |
| Social Actors Involved | 10.01 | No | Import and sale not allowed by Ordinance IBAMA 93/1998 |
| 10.02 |  |  |
| 10.03 | Yes | Only need waybill issued by any vet without restriction (Normative Instruction IBAMA 07/2015) |
| 10.04 | No | Import and sale not allowed by Ordinance IBAMA 93/1998 |

Table 3: Risk Assessment (Pereira and Ziller, 2008) for invasion of the chipmunk *Tamias sibiricus* in Brazilian territory.

| **THE HORUS INSTITUTE FOR ENVIRONMENTAL CONSERVATION AND DEVELOPMENT** | | | | |
| --- | --- | --- | --- | --- |
| **RESULT** | | | | |
| **Pontuation: 82.5** | | | **Valid Avaliation (>70% of answers)** | **High Risk** |
| **RISK ASSESSMENT FOR NON-NATIVE TERRESTRIAL VERTEBRATES** | | | | |
| **Section** | **Group** |  | **Answers *Tamias sibiricus*** | **References** |
| **Biological and ecological features** | | | |  |
| A | Reproductive Mechanisms | 1.01 | Yes | (Long, 2003) |
| 1.02 | Yes | (DAISIE, 2015; Long, 2003) |
| 1.03 | No | (NNSS, 2015) |
| 1.04 | Yes | (DAISIE, 2015; Long, 2003) |
| Food Group | 2.01 | No | (Long, 2003) |
| 2.02 | Yes | (DAISIE, 2015; Long, 2003) |
| 2.03 |  |  |
| 2.04 | Yes | (Long, 2003) |
| Ecological Interactions | 3.01 | Yes | (Forstmeier and Weiss, 2004; NNSS, 2015) |
| 3.02 |  |  |
| 3.03 | Yes | (NNSS, 2015) |
| 3.04 | Yes | (DAISIE, 2015; NNSS, 2015; Pimentel, 2014) |
| 3.05 | Yes | (Anufriev and Arkhipov, 2004; DAISIE, 2015; Long, 2003) |
| Hábitat | 4.01 | No | (DAISIE, 2015; Marmet et al., 2009; Marmet et al., 2011; NNSS, 2015) |
| 4.02 | Yes | (DAISIE, 2015; Long, 2003) |
| 4.03 | Yes | (Fløjgaard et al., 2009; NNSS, 2015) |
| **Biogeographic features** | | | |  |
| B | Occurrence | 5.01 | Yes | (Long, 2003; NNSS, 2015) |
| 5.02 | Yes | (Benassi and Bertolino, 2011; Long, 2003) |
| 5.03 | No | (Long, 2003; Tsytsulina et al., 2008) |
| 5.04 | Yes | (Long, 2003) |
| 5.05 | Yes | (Long, 2003; Tsytsulina et al., 2008) |
| **Social and economic features** | | | |  |
| C | Economic importance of the taxon | 6.01 | No | We did not found reasons encouraging the creation of this taxon the meat consumption |
| 6.02 | Yes | Sold in pet stores throughout Brazil |
| 6.03 | Yes | (DAISIE, 2015; Long, 2003; NNSS, 2015) |
| Risk to People | 7.01 | No | There are no records of accidents and aggression |
| 7.02 | No | There are no records of toxins inoculated by this species |
| 7.03 | Yes | (Bonnet et al., 2015; NNSS, 2015) |
| **Characteristics that potentialize risk** | | | |  |
| D | Contamination by Pathogens and Parasites | 8.01 | Yes | (Kim et al., 2011; Klein et al., 2015; Marsot et al., 2011; NNSS, 2015) |
| 8.02 | No | There is no epidemic events |
| Persistence Attributes | 9.01 | Mammal | (Long, 2003) |
| 9.02 | Yes | (DAISIE, 2015; Long, 2003; NNSS, 2015) |
| 9.03 | Yes | (Yi et al., 2015) |
| 9.04 | No | We did not find usage records for human consumption |
| 9.05 |  |  |
| 9.06 |  |  |
| Social Actors Involved | 10.01 | No | Import and sale not allowed by Ordinance IBAMA 93/1998 |
| 10.02 |  |  |
| 10.03 | Yes | Only need waybill issued by any vet without restriction (Normative Instruction IBAMA 07/2015) |
| 10.04 | No | Import and sale not allowed by Ordinance IBAMA 93/1998 |

Table 4: Risk Assessment (Pereira and Ziller, 2008) for invasion of the gerbil *Meriones unguicuatus* in Brazilian territory.

| **THE HORUS INSTITUTE FOR ENVIRONMENTAL CONSERVATION AND DEVELOPMENT** | | | | | |
| --- | --- | --- | --- | --- | --- |
| **RESULT** | | | | | |
| **Pontuation: 88.5** | | | **Valid Avaliation (>70% of answers)** | | **High Risk** |
| **RISK ASSESSMENT FOR NON-NATIVE TERRESTRIAL VERTEBRATES** | | | | | |
| **Section** | **Group** |  | **Answers *Merioness unguiculatus*** | **References** | |
| **Biological and ecological features** | | | |  | |
| A | Reproductive Mechanisms | 1.01 | Yes | (Prates and Guerra, 2005) | |
| 1.02 | Yes | (Gulotta, 1971; Long, 2003) | |
| 1.03 | Yes | (Gulotta, 1971; Long, 2003) | |
| 1.04 | Yes | (Gulotta, 1971; Long, 2003) | |
| Food Group | 2.01 | No | (Gulotta, 1971; Long, 2003) | |
| 2.02 |  |  | |
| 2.03 | Yes | (Agren et al., 1989; Gulotta, 1971) | |
| 2.04 | Yes | (Gulotta, 1971; Long, 2003) | |
| Ecological Interactions | 3.01 | No | (Long, 2003) | |
| 3.02 |  |  | |
| 3.03 | Yes | (Long, 2003) | |
| 3.04 | Yes | (Scheiber et al., 2005; Scheibler and Wollnik, 2009) | |
| 3.05 | Yes | (Li et al., 2001; Li and Wang, 2005) | |
| Hábitat | 4.01 | No | (Long, 2003) | |
| 4.02 | Yes | (Scheiber et al., 2005; Zhong et al., 1985) | |
| 4.03 | Yes | (Gulotta, 1971; Scheiber et al., 2005) | |
| **Biogeographic features** | | | |  | |
| B | Occurrence | 5.01 | Yes | (Long, 2003) | |
| 5.02 | Yes | (Long, 2003) | |
| 5.03 | No | (Batsaikhan and Tsytsulina, 2008; Long, 2003) | |
| 5.04 | Yes | (Long, 2003) | |
| 5.05 | Yes | (DAISIE, 2015; Long, 2003) | |
| **Social and economic features** | | | |  | |
| C | Economic importance of the taxon | 6.01 | Yes | (Gulotta, 1971) | |
| 6.02 | Yes | Sold in pet stores throughout Brazil | |
| 6.03 | Yes | (Long, 2003) | |
| Risk to People | 7.01 | No | (Gulotta, 1971) | |
| 7.02 | No | There are no records of toxins inoculated by this species | |
| 7.03 | Yes | (Gaastra et al., 2009) | |
| **Characteristics that potentialize risk** | | | |  | |
| D | Contamination by Pathogens and Parasites | 8.01 | Yes | (Dubey and Lindsey, 2000; Langey and Gray, 1987) | |
| 8.02 | No | (Gulotta, 1971) | |
| Persistence Attributes | 9.01 | Mammal | (Long, 2003) | |
| 9.02 | No | (Agren et al., 1989) | |
| 9.03 |  |  | |
| 9.04 | No | We did not find usage records for human consumption | |
| 9.05 |  |  | |
| 9.06 |  |  | |
| Social Actors Involved | 10.01 | No | Import and sale not allowed by Ordinance IBAMA 93/1998 | |
| 10.02 | Yes | Common in pet stores and with large numbers of pets supporters in Brazil | |
| 10.03 | Yes | Only need waybill issued by any vet without restriction (Normative Instruction IBAMA 07/2015) | |
| 10.04 | No | Import and sale not allowed by Ordinance IBAMA 93/1998 | |

Table 5: Risk Assessment (Pereira and Ziller, 2008) for invasion of the sugar glider *Petaurus breviceps* in Brazilian territory.

| **THE HORUS INSTITUTE FOR ENVIRONMENTAL CONSERVATION AND DEVELOPMENT** | | | | | |
| --- | --- | --- | --- | --- | --- |
| **RESULT** | | | | | |
| **Pontuation: 71** | | | **Valid Avaliation (>70% of answers)** | | **High Risk** |
| **RISK ASSESSMENT FOR NON-NATIVE TERRESTRIAL VERTEBRATES** | | | | | |
| **Section** | **Group** |  | **Answers *Petaurus breviceps*** | **References** | |
| **Biological and ecological features** | | | |  | |
| A | Reproductive Mechanisms | 1.01 | Yes | (Long, 2003; Smith, 1973) | |
| 1.02 | Yes | (Long, 2003) | |
| 1.03 | Yes | (Jackson, 2000; Smith, 1973) | |
| 1.04 | No | (Long, 2003; Smith, 1973) | |
| Food Group | 2.01 | No | (Long, 2003; Smith, 1973; Smith, 1982) | |
| 2.02 |  |  | |
| 2.03 | No | (Smith, 1973; Smith, 1982) | |
| 2.04 | Yes | (Long, 2003; Smith, 1973; Smith, 1982) | |
| Ecological Interactions | 3.01 | Yes | (Heinsohn et al., 2015; Stojanovic et al., 2014) | |
| 3.02 | No | (Schultze-Westrum, 1969; Smith, 1973) | |
| 3.03 |  |  | |
| 3.04 | Yes | (Booth, 2003; Lindenmayer and Cunningham, 1997; Smith, 1973) | |
| 3.05 | Yes | (Geiser, 2004; Geiser et al., 2007; Quin et al., 2010) | |
| Hábitat | 4.01 | No | (Caryl et al., 2013; Jackson, 2000; Taylor and Rohweder, 2013) | |
| 4.02 | Yes | (Caryl et al., 2013; Smith, 1973) | |
| 4.03 | Yes | (Geiser, 2004; Geiser et al., 2007; Quin et al., 2010) | |
| **Biogeographic features** | | | |  | |
| B | Occurrence | 5.01 | Yes | (Long, 2003) | |
| 5.02 | Yes | (Heinsohn et al., 2015; Long, 2003; Stojanovic et al., 2014) | |
| 5.03 | No | (Smith, 1973) | |
| 5.04 | Yes | (Booth, 2003) | |
| 5.05 | Yes | (Long, 2003) | |
| **Social and economic features** | | | |  | |
| C | Economic importance of the taxon | 6.01 | No | We did not found reasons encouraging the creation of this taxon for the meat consumption | |
| 6.02 | Yes | Sold in pet stores throughout Brazil | |
| 6.03 | No | (Long, 2003) | |
| Risk to People | 7.01 | No | (Booth, 2003) | |
| 7.02 | No | There are no records of toxins inoculated by this species | |
| 7.03 | Yes | (Nichols et al., 2015; Smith, 1973) | |
| **Characteristics that potentialize risk** | | | |  | |
| D | Contamination by Pathogens and Parasites | 8.01 | Yes | (Holz and Graham, 2008; Nichols et al., 2015; Smith, 1973) | |
| 8.02 | No | There is no epidemic events | |
| Persistence Attributes | 9.01 | Mammal | (Long, 2003) | |
| 9.02 | No | (Smith, 1973; Smith, 1982) | |
| 9.03 |  |  | |
| 9.04 | No | (Smith, 1973) | |
| 9.05 |  |  | |
| 9.06 |  |  | |
| Social Actors Involved | 10.01 | No | Common in pet stores and with large numbers of pets supporters in Brazil | |
| 10.02 |  | Common in pet stores and with large numbers of pets supporters in Brazil | |
| 10.03 | Yes | Common in pet stores and with large numbers of pets supporters in Brazil | |
| 10.04 | No | Common in pet stores and with large numbers of pets supporters in Brazil | |

Table 6: Risk Assessment (Pereira and Ziller, 2008) for invasion of the skunk *Mephitis mephitis* in Brazilian territory.

| **THE HORUS INSTITUTE FOR ENVIRONMENTAL CONSERVATION AND DEVELOPMENT** | | | | |
| --- | --- | --- | --- | --- |
| **RESULT** | | | | |
| **Pontuation: 79** | | | **Valid Avaliation (>70% of answers)** | **High Risk** |
| **RISK ASSESSMENT FOR NON-NATIVE TERRESTRIAL VERTEBRATES** | | | | |
| **Section** | **Group** |  | **Answers *Mephitis mephitis*** | **References** |
| **Biological and ecological features** | | | |  |
| A | Reproductive Mechanisms | 1.01 | Yes | (Long, 2003) |
| 1.02 | No | (Long, 2003) |
| 1.03 | No | (Johnson-Delaney, 2014; Long, 2003) |
| 1.04 | No | (Long, 2003) |
| Food Group | 2.01 | Yes | (Long, 2003) |
| 2.02 | Yes | (Aleksiuk and Stewart, 1977; Mustonen et al., 2013) |
| 2.03 | No | Taxon is carnivorous and there are no records of consumption or vegetation compression for any species of *Mephitis* sp. |
| 2.04 | Yes | (Long, 2003) |
| Ecological Interactions | 3.01 | Yes | (Alvarez et al., 2014; Azevedo et al., 2006; Harrison et al., 2011; Long, 2003) |
| 3.02 |  |  |
| 3.03 |  |  |
| 3.04 |  |  |
| 3.05 | Yes | (Aleksiuk and Stewart, 1977; Mustonen et al., 2013) |
| Hábitat | 4.01 | Yes | (Brashear et al., 2015; Long, 2003; Neiswenter et al., 2010; Rosatte et al., 1992) |
| 4.02 | Yes | (Harrison et al., 2011; Kowalski, 2003; Lesmeister et al., 2015) |
| 4.03 | Yes | (Mustonen et al., 2013) |
| **Biogeographic features** | | | |  |
| B | Occurrence | 5.01 | Yes | (Long, 2003) |
| 5.02 | Yes | (Long, 2003) |
| 5.03 | No | (Long, 2003; Reid and Helgen, 2008b) |
| 5.04 | Yes | (Long, 2003) |
| 5.05 | Yes | (DAISIE, 2015; Long, 2003) |
| **Social and economic features** | | | |  |
| C | Economic importance of the taxon | 6.01 | No | We did not found reasons encouraging the creation of this taxon for the meat consumption |
| 6.02 | Yes | (Long, 2003) |
| 6.03 | Yes | (Long, 2003) |
| Risk to People | 7.01 | Yes | (Johnson-Delaney, 2014) |
| 7.02 |  |  |
| 7.03 | Yes | (Barton et al., 2010; Brown et al., 2014; Dubey and Jones, 2008; Gajadhar and Forbes, 2010) |
| **Characteristics that potentialize risk** | | | |  |
| D | Contamination by Pathogens and Parasites | 8.01 | Yes | (Barton et al., 2010; Brown et al., 2014; Dubey and Jones, 2008; Gajadhar and Forbes, 2010) |
| 8.02 | Yes | (Brashear, 2013; Brown et al., 2014) |
| Persistence Attributes | 9.01 | Mammal | (Long, 2003) |
| 9.02 | No | There are no records of direct (consumption) or indirect (feces, urine, etc.) damage to agriculture |
| 9.03 |  |  |
| 9.04 | No | We did not find usage records for human consumption |
| 9.05 |  |  |
| 9.06 |  |  |
| Social Actors Involved | 10.01 | No | Import and sale not allowed by Ordinance IBAMA 93/1998 |
| 10.02 |  |  |
| 10.03 | Yes | Only need waybill issued by any vet without restriction (Normative Instruction IBAMA 07/2015) |
| 10.04 | No | Import and sale not allowed by Ordinance IBAMA 93/1998 |

Table 7: Risk Assessment (Pereira and Ziller, 2008) for invasion of the stoat *Mustela erminea* in Brazilian territory.

| **THE HORUS INSTITUTE FOR ENVIRONMENTAL CONSERVATION AND DEVELOPMENT** | | | | | |
| --- | --- | --- | --- | --- | --- |
| **RESULT** | | | | | |
| **Pontuation: 68.5** | | | | **Valid Avaliation (>70% of answers)** | **High Risk** |
| **RISK ASSESSMENT FOR NON-NATIVE TERRESTRIAL VERTEBRATES** | | | | | |
| **Section** | **Group** | |  | **Answers *Mustela erminea*** | **References** |
| **Biological and ecological features** | | | | |  |
| A | Reproductive Mechanisms | | 1.01 | Yes | (Long, 2003) |
| 1.02 | No | (Csurhes and Markula, 2010; King, 2002) |
| 1.03 | No | (Csurhes and Markula, 2010; King, 2002; King and Moody, 1982) |
| 1.04 | Yes | (Csurhes and Markula, 2010; King, 2002) |
| Food Group | | 2.01 | Yes | (Long, 2003) |
| 2.02 | No | (Harris and Yalden, 2008) |
| 2.03 | No | (Hoset et al., 2014) |
| 2.04 | Yes | (King et al., 2003; Long, 2003; Martinoli et al., 2001; Remonti et al., 2007) |
| Ecological Interactions | | 3.01 | Yes | (Edwards and Forbes, 2003; Elmeros, 2006; Long, 2003; Moorhouse et al., 2003) |
| 3.02 |  |  |
| 3.03 |  |  |
| 3.04 | Yes | (Erlinge, 1983) |
| 3.05 |  |  |
| Hábitat | | 4.01 | Yes | (Gillies et al., 2007; King, 1983; Long, 2003; Reid and Helgen, 2008; Samson and Raymond, 1995; Veale et al., 2012) |
| 4.02 | Yes | (Cervinka et al., 2013; Csurhes and Markula, 2010; Klemola et al., 1999; Ratz, 2000; Smith et al., 2007) |
| 4.03 |  |  |
| **Biogeographic features** | | | | |  |
| B | Occurrence | 5.01 | | Yes | (Long, 2003) |
| 5.02 | | Yes | (Long, 2003) |
| 5.03 | | No | (Long, 2003; Reid and Helgen, 2008) |
| 5.04 | | Yes | (Long, 2003) |
| 5.05 | | Yes | (Long, 2003; Reid and Helgen, 2008) |
| **Social and economic features** | | | | |  |
| C | Economic importance of the taxon | 6.01 | | No | We did not found reasons encouraging the creation of this taxon for the meat consumption |
| 6.02 | | Yes | Sold in pet stores throughout Brazil |
| 6.03 | | No | (Long, 2003) |
| Risk to People | 7.01 | |  |  |
| 7.02 | | No | There are no records of toxins inoculated by this species |
| 7.03 | | Yes | (Burrells et al., 2013; Csurhes and Markula, 2010) |
| **Characteristics that potentialize risk** | | | | |  |
| D | Contamination by Pathogens and Parasites | 8.01 | | Yes | (Burrells et al., 2013; Csurhes and Markula, 2010; Dubay et al., 2014; Oltean et al., 2014; Pavlacik et al., 2007; Stuart et al., 2012) |
| 8.02 | |  |  |
| Persistence Attributes | 9.01 | | Mammal | (Long, 2003) |
| 9.02 | | No | There are no records of direct (consumption) or indirect (feces, urine, etc.) damage to agriculture |
| 9.03 | |  |  |
| 9.04 | | No | (Csurhes and Markula, 2010; Reid and Helgen, 2008) |
| 9.05 | | No | (Csurhes and Markula, 2010) |
| 9.06 | | No | (Csurhes and Markula, 2010; King et al., 2009) |
| Social Actors Involved | 10.01 | | No | Import and sale not allowed by Ordinance IBAMA 93/1998 |
| 10.02 | |  |  |
| 10.03 | | Yes | Only need waybill issued by any vet without restriction (Normative Instruction IBAMA 07/2015) |
| 10.04 | | No | Import and sale not allowed by Ordinance IBAMA 93/1998 |

**Bibliographic References**

Agren, G., Zhou, Q., Zhong, W., 1989. Ecology and social behaviour of the Mongolian gerbil, *Meriones unguicalatus* at Xilinhot, inner Mongolia, China. Anim. Behav. 37, 11–27.

Aleksiuk, M., Stewart, A.P., 1977. Food intake, weight changes and activity of confined striped skunks (*Mephitis mephitis*) in winter. Am. Midl. Nat. 98, 331–342.

Alvarez, J.A., Davidson, K.A., Foster, A.M., 2014. *Actinemys marmorata* (Western Pond Turtle) Nest Predation Association. Herpetol. Rev. 45(2), 307-308.

Amori, G., Hutterer, R., Kryštufek, B., Yigit, N., Mitsain, G., Palomo, L.J., 2008. *Erinaceus europaeus*. The IUCN Red List of Threatened Species: http://dx.doi.org/10.2305/IUCN.UK.2008.RLTS.T29650A9508219.en. (accessed 09.02.17).

Anufriev, A.I., Arkhipov, G.G., 2004. Influence of body weight and size on the mode of wintering in hibernators of the family Sciuridae in Northeastern Russia. Russ. J. Ecol. 35(3), 189–193.

Azevedo, F.C.C., Lester, V., Gorsuch, W., Lariviere, S., Wirsing, A.J., Murray, D.L., 2006. Dietary breadth and overlap among five sympatric prairie carnivores. J. Zool. 269, 127–135.

Baker, P., Harris, S., 2007. Urban mammals: what does the future hold? An analysis of the factors affecting patterns of use of residential gardens in Great Britain. Mammal Rev. 37 (4), 297–315

Barton, H.D., Gregory, A.J., Davis, R., Hanlon, C.A., Wisely, S.M., 2010. Contrasting landscape epidemiology of two sympatric rabies virus strains. Mol. Ecol., 19, 2725–2738.

Batsaikhan, N., Tsytsulina, K., 2008. *Meriones unguiculatus*. The IUCN Red List of Threatened Species, 2008: http://dx.doi.org/10.2305/IUCN.UK.2008.RLTS.T13171A3418036.en. (accessed 09.02.17).

Benassi, G., Bertolino, S., 2011. Distribution and activity of the introduced *Tamias sibiricus* (Laxmann, 1769) in an urban park in Rome, Italy. Mammal. 75, 87–90.

Bonnet, S., Choumet, V., Masseglia, S., Cote, M., Ferquel, E., Lilin, T., Marsot, M., Chapuis, J., Vourch, G., 2015. Infection of Siberian chipmunks (*Tamias sibiricus barberi*) with *Borrelia* sp. reveals a low reservoir competence under experimental conditions. Ticks Tick. Borne. Dis. 6, 393–400.

Booth, R., 2003. Sugar Gliders. Sem. Avian Exot. Pet. 12(4), 228-231.

Brashear, W.A., 2013. An assessment of the genetic structure of a striped skunk (M*ephitis mephitis*) population across an urban landscape. Dissertation, Angelo State University, San Angelo, Texas.

Brashear, W.A., Ammerman, L.K., Dowler, R.C., 2015. Short-distance dispersal and lack of genetic structure in an urban striped skunk population. J. Mammal. 96(1), 72–80.

Brown, L.J., Rosatte, R.C., Fehlner-Gardiner, C., Ellison, J.A., Jackson, F.R., Bachmann, P., Taylor, J.S., Franka, R., Donovan, D., 2014. Oral vaccination and protection of striped skunks (*Mephitis mephitis*) against rabies using ONRAB ®. Vaccine 32, 3675–3679.

Bunnell, T., 2009. Growth rate in early and late litters of the European hedgehog (*Erinaceus europaeus*). Lutra 52(1), 15-22.

Burrells, A., Bartley, P.M., Zimmer, I.A., Roy, S., Kitchener, A.C., Meredith, A., Wright, S.E., Innes, E.A., Katzer, F., 2013. Evidence of the three main clonal *Toxoplasma gondii* lineages from wild mammalian carnivores in the UK. Parasitol. 140, 1768–1776.

Campbell, P.A., 1973. The feeding behaviour of the Hedgehog (*Erinaceus europaeus*) in pasture land in New Zealand. Proc. New Zeal. Ecol. Soc. 20, 35-40.

Caryl, F.M., Thomson, K., Van Der Ree, R., 2013. Permeability of the urban matrix to arboreal gliding mammals: Sugar gliders in Melbourne, Australia. Austral Ecol. 38, 609–616.

Cervinka, J., Sálek, M., Padysáková, E., Smilauer, P., 2013. The effects of local and landscape-scale habitat characteristics and prey availability on corridor use by carnivores: A comparison of two contrasting farmlands. J. Nat. Conserv., 21, 105–113.

Cirak, V.Y., Senlik, B., Aydogdu, A., Selver, M., Akyol, V., 2010. Helminth parasites found in hedgehogs (*Erinaceus concolor*) from Turkey. Prev. Vet. Med. 97, 64–66.

Csurhes, S., Markula, A., 2010. Pest risk assessment: Stoat (*Mustela erminea*). Department of Employment, Economic Development and Innovation Biosecurity Queensland, Queensland.

DAISIE, 2015. Delivering Alien Invasive Species Inventories for Europe. http://www.europe-aliens.org/. (accessed 29.02.17).

Dowding, C.V., Harris, S., Poulton, S., Baker, P.J., 2010. Nocturnal ranging behaviour of urban hedgehogs, *Erinaceus europaeus*, in relation to risk and reward. Anim. Behav. 80, 13-21.

Dubay, S., Buchholz, M.J., Lisiecki, R., Huspeni, T., Ginnett, T., Haen, L., Borsdorf, P., 2014. Prevalence and intensity of nematode parasites in Wisconsin Ermine. J Parasitol. 100(5), 616-622.

Dubey, J.P., Jones, J.L., 2008. *Toxoplasma gondii* infection in humans and animals in the United States. Int. J. Parasitol. 38, 1257–1278.

Dubey, J.P., Lindsay, D.S., 2000. Gerbils (*Meriones unguiculatus*) are highly susceptible to oral infection with *Neospora caninum* oocysts. Parasitol. Res. 86, 165-168.

Edwards, M.A., Forbes, G.J., 2003. Food Habits of Ermine, *Mustela erminea*, in a Forested Landscape. Can. Field. Nat. 117, 245-248.

Elmeros, M., 2006. Food habits of stoats *Mustela erminea* and weasels *Mustela nivalis* in Denmark. Acta. Theriol. 51(2), 179–186.

English, M.P., Morris, P., 1969. *Trichophyton mentagrophytes* var *erinacei* in hedgehog nests. Sabouraudia 7, 118-121.

Erlinge, S., 1983. Demography and dynamics of a Stoat *Mustela erminea* population in a diverse community of vertebrates. J. Anim. Ecol. 52(3), 705-726.

Fløjgaard, C., Morueta-Holme, N., Skov, F., Madsen, A.B., Svenning, J., 2009. Potential, 21st century changes to the mammal fauna of Denmark – implications of climate change, land-use, and invasive species. Earth Environ. Sci. 8, 1-17.

Forstmeier, W., Weiss, I., 2004. Adaptive plasticity in nest-site selection in response to changing predation risk. Oikos 104, 487-499.

Fowler, P.A., Racey, P.A., 1987. Relationship between body and testis temperatures in the European hedgehog, *Erinaceus europaeus*, during hibernation and sexual reactivation. J. Reprod. Fert. 81, 567-573.

Fowler, P.A., Racey, P.A., 1990. Daily and seasonal cycles of body temperature and aspects of heterothermy in the hedgehog *Erinaceus europaeus.* J. Comp. Physiol. B 160, 299-307.

Gaastra, W., Boot, R., Ho, H.T.K., Lipman, L.J.A., 2009. Rat bite fever. Vet. Microbiol. 133, 211–228.

Gajadhar, A.A., Forbes, L.B., 2010. A, 10-year wildlife survey of, 15 species of Canadian carnivores identifies new hosts or geographic locations for Trichinella genotypes T2, T4, T5, and T6. Vet. Parasitol. 168, 78–83.

Geiser, F., 2004. metabolic rate and body temperature reduction during hibernation and daily torpor. Annu. Rev. Physiol. 66, 239–74.

Geiser, F., Holloway, J.C., Körtner, G., 2007. Thermal biology, torpor and behaviour in sugar gliders: a laboratory-Weld comparison. J. Comp. Physiol. B, 177, 495–501.

Gillies, C.A., Graham, P.J., Clout, M.N., 2007. Home ranges of introduced mammalian carnivores at Trounson Kauri Park, Northland, New Zealand. New Zeal. Zool. 34, 317-333.

Griffiths, R., Buchanan, F., Broome, K., Neilsen, J., Brown, D., Weakley, M., 2015. Successful eradication of invasive vertebrates on Rangitoto and Motutapu Islands, New Zealand. Biol. Invasions 17, 1355–1369.

Gulotta, A., 1971. *Meriones unguiculatus*. Mamm. Species 3, 1-5.

Hagman, M., Löwenborg, K., Shine, R., 2015. Determinants of anti-predator tactics in hatchling grass snakes (*Natrix natrix*). Behav. Process. 113, 60–65.

Haigh, A., Butler, F., O’Riordan, R.M., 2012. Habitat use by the European hedgehog (*Erinaceus europaeus* L., 1758) in an Irish rural landscape, in: Butler, F., Kelleher, C. (Eds.), All-Ireland Mammal Symposium, 2009, Irish Naturalists’ Journal, Belfast, pp. 23-30.

Harris, S., Yalden, D., 2008.Mammals of the British Isles (4th Revised ed.). Mammal Society, Coalville.

Harrison, S.W.R., Cypher, B.L., Bremner-Harrison, S., Job, C.L.V.H., 2011. Resource use overlap between urban carnivores: Implications for endangered San Joaquin kit foxes (*Vulpes macrotis mutica*). Urban Ecosyst. 14, 303–311.

Heinsohn, R., Webb, M., Lacy, R., Terauds, A., Alderman, R., Stojanovic, D., 2015. A severe predator-induced population decline predicted for endangered, migratory swift parrots (*Lathamus discolor*). Biol. Conserv. 186, 75–82.

Hof, A.R., Bright, P.W., 2010. The value of agri-environment schemes for macro-invertebrate feeders: hedgehogs on arable farms in Britain. Anim. Conserv. 13, 467–473.

Holz, P.H., Graham, K.J., 2008. Neurological bacterial diseases in possums and gliders: a review of eight cases. Aust. Vet. J. 86(8), 302-302.

Hoset, K.S., Kyrö, K., Oksanen, T., Oksanen, L., Olofsson, J., 2014. Spatial variation in vegetation damage relative to primary productivity, small rodent abundance and predation. Ecography 37, 894–901.

Jackson, S.M., 2000. Population dynamics and life history of the mahogany glider, *Petaurus gracilis*, and the sugar glider, *Petaurus breviceps*, in north Queensland. Wildl. Res., 27(1), 21-37.

Jackson, D.B., Green, R.E., 2000. The importance of the introduced hedgehog (*Erinaceus europaeus*) as a predator of the eggs of waders (Charadrii) on machair in South Uist, Scotland. Biol. Conserv. 93, 333-348.

Jackson, D.B., Fuller, R.J., Campbell, S.T., 2004. Long - term population changes among breeding shorebirds in the Outer Hebrides, Scotland, in relation to introduced hedgehogs (*Erinaceus europaeus*). Biol. Conserv. 117, 151–166.

Johnson-Delaney, C., 2014. Pet Virginia opossums and skunks. J. Exot. Pet. Med. 23, 317–326.

Jones, C., Norbury, G., 2011. Feeding selectivity of introduced hedgehogs *Erinaceus europaeus* in a dryland habitat, South Island, New Zealand. Acta Theriol. 56, 45–51.

Jones, C., Moss, K., Sanders, M., 2005. Diet of hedgehogs (*Erinaceus europaeus*) in the upper Waitaki Basin, New Zealand: Implications for conservation. New Zeal. J. Ecol. 29(1), 29-35.

Kim, H.C., Han, S.H., Chong, S.T., Klein, T.A., Choi, C., Nam, H., Chae, H., Lee, H., Ko, S., Kang, J., Chae, J., 2011. Ticks Collected from Selected Mammalian Hosts Surveyed in the Republic of Korea During, 2008-2009. Korean J. Parasitol. 49(3), 331-335.

King, C.M., Moody, J.E., 1982. The biology of the stoat (*Mustela erminea*) in the National Parks of New Zealand IV. Reproduction. New Zeal. J. Zool 9, 103-118.

King, C.M., 1983*.* *Mustela erminea*. Mamm. Species 195, 1-8.

King, C.M., 2002. Cohort variation in the life-history parameters of stoats *Mustela erminea* in relation to fluctuating food resources: a challenge to boreal ecologists. Acta Theriol. 47(3), 225–244.

King, C.M., White, P.C.L., Purdey, D.C., Lawrence, B., 2003. Matching productivity to resource availability in a small predator, the stoat (*Mustela erminea*). Can. J. Zool. 81(4), 662–669.

King, C.M., McDonald, R.M., Martin, R.D., Dennis, T., 2009. Why is eradication of invasive mustelids so difficult? Biol. Conserv. 142, 806-816.

Klein, T.A., Kim, H.C., Chong, S., Kim, K., Lee, S., Kim, W., Nunn, P.V., Song, J., 2015. Hantaan virus surveillance targeting small mammals at nightmare range, a high elevation military training area, Gyeonggi Province, Republic of Korea. Plos One 10(4), 1-14.

Klemola, T., Korpimäki, E., Norrdahl, K., Tanhuanpää, M., Koivula, M., 1999. Mobility and habitat utilization of small mustelids in relation to cyclically fluctuating prey abundances. Ann. Zool. Fenn. 36, 75–82.

Kowalski, B.L., 2003. Effects of landscape covariates on the distribution and detection probabilities of mammalian carnivores on the former fortord, California. Dissertation, California State University, Monterey Bay.

Krawczyket, A., van Leeuwen, A.D., Jacobs-Reitsma, W., Wijnands, L.M., Bouw, E., Jahfari, S., van Hoek, A.H.A.M., der Giessen, J.W.B., Roelfsema, J.H., Kroes, M,. Kleve, J., Dullemont, Y., Sprong, H., de Bruin, A., 2015. Presence of zoonotic agents in engorged ticks and hedgehog faeces from *Erinaceus europaeus* in (sub) urban areas. Parasit. Vectors 8, 210.

Kross, S.M., Mcdonald, P.G., Nelson, X.J., 2013. New Zealand Falcon nests suffer lower predation in agricultural habitat than in natural habitat. Bird Conserv. Int. 23(4), 512-519.

Langey, R.J., Gray, J.S., 1987. Age-related susceptibility of the Gerbil, *Meriones unguiculatus*, to the Bovine Parasite, *Babesia divergens*. Exp. Parasitol. 64, 466-473.

Lesmeister, D.B., Nielsen, C.K., Schauber, E.M., Hellgren, E.C., 2015. Spatial and temporal structure of a mesocarnivore guild in midwestern North America. Wild. Monogr. 191, 1-61.

Li, X.H., Wang, D., 2005. Seasonal adjustments in body mass and thermogenesis in Mongolian gerbils (*Meriones unguiculatus*): the roles of short photoperiod and cold. J. Comp. Physiol. B 175, 593–600.

Li, Q., Sun, R., Huang, C., Wang, Z., Liu, X., Hou, J., Liu, J., Cai, L., Li, N., Zhang, S., Wang, Y., 2001. Cold adaptive thermogenesis in small mammals from different geographical zones of China. Comp. Biochem. Phys. A 129, 949-961.

Lindenmayer, D.B., Cunningham, R.B., 1997. Patterns of co-occurrence among arboreal marsupials in the forests of central Victoria, southeastern Australia. Aust. J. Ecol. 22, 340-346.

Lockwood, J., Cassey, P., Blackburn, T., 2005. The role of propagule pressure in explaining species invasions. Trends Ecol. Evol. 20(5), 223-228.

Long, J. L., 2003. Introduced Mammals of the World -Their History, Distribution and Influence. Csiro Publishing, Collingwood.

Marmet, J., Pisanu, B., Chapuis, J., 2009. Home range, range overlap, and site fidelity of introduced Siberian chipmunks in a suburban French Forest. Eur. J. Wildl. Res. 55, 497–504.

Marmet, J., Pisanu, B., Chapuis, J., 2011. Natal dispersal of introduced Siberian chipmunks, *Tamias sibiricus*, in a suburban forest. J. Ethol. 29, 23–29.

Marsot, M., Sigaud, M., Chapuis, J., Ferquel, E., Cornet, M., Vourch, G., 2011. Introduced siberian chipmunks (*Tamias sibiricus barberi*) harbor more-diverse B*orrelia burgdorferi* sensu lato genospecies than native bank voles (M*yodes glareolus*). Appl. Environ. Microb. 77(16), 5716–5721.

Martinoli, A., Preatoni, D.G., Chiarenzi, B., Wauters, L.A., Tosi, G., 2001. Diet of stoats (*Mustela erminea*) in an Alpine habitat: The importance of fruit consumption in summer. Acta Theriol. 22, 45−53.

Moorhouse, R., Greene, T., Dilks, P., Powlesland, R., Moran, L., Taylor, G., Jones, A., Knegtmans, J., Wills, D., Pryde, M., Fraser, I., August, A., August, C., 2003. Control of introduced mammalian predators improves kaka *Nestor meridionalis* breeding success: reversing the decline of a threatened New Zealand parrot. Biol. Conserv. 110, 33–44.

Morris, P.A., Munn, S., Craig-Wood, S., 1992. The effects of releasing captive hedgehogs (*Erinaceus europaeus*) into the wild. Field Stud. 8, 89-99.

Moss, K.A., 1999. Diet, nesting behaviour, and home range size of the European hedgehog (*Erinaceus europaeus*) in the braide drivers of the Mackenzie Basin, New Zealand. Dissertation, University of Canterbury, Canterbury.

Moss, K., Sanders, M., 2001. Advances in New Zealand mammalogy, 1990–2000: Hedgehog. J. Roy. Soc. New Zeal. 31(1), 31-42.

Mustonen, A., Bowman, J., Sadowski, C., Nituch, L.A., Bruce, L., Halonen, T., Puukka, K., Rouvinen-Watt, K., Aho, J., Nieminen, P., 2013. Physiological adaptations to prolonged fasting in the overwintering striped skunk (*Mephitis mephitis*). Comp. Biochem. Phys. A 166, 555–563.

Neiswenter, S.A., Dowler, R.C., Young, J.H., 2010. Activity patterns of two sympatric species of Skunks (*Mephitis mephitis* and *Spilogale gracilis*) in Texas. Southwestern Nat. 55(1), 16-21.

Nichols, M., Takacs, N., Ragsdale, J., Levenson, D., Marquez, C., Roache, K., Tarr, C.L., 2015. *Listeria monocytogenes* infection in a Sugar Glider (*Petaurus breviceps*)–New Mexico. Zoonoses Public Health 62, 254–257.

NNSS, 2015. Great Britain non-native species secretariat. http://www.nonnativespecies.org. (accessed 29.02.17).

Oltean, M., Kalmar, Z., Kiss, B.J., Marinov, M., Vasile, A., Sandor, A., Doms, C., Gherman, C.M., Boireau, P., Cozma, V., Mihalca, A.D., Rosenthal, B.M., 2014. European mustelids occupying pristine wetlands in the danube delta are infected with Trichinella likely derived from domesticated swine. J. Wildl. Dis. 50(4), 972–975.

Pavlacik, L., Celer, V., Koubek, P., Literak, I., 2007. Prevalence of canine distemper virus in wild mustelids in the Czech Republic and a case of canine distemper in young stone martens. Vet. Med. Czech 52(2), 69–73.

Pereira, L.A., Ziller, S.R., 2011. Manual for the Risk Analysis of Terrestrial Vertebrates. Cinco Reinos/Instituto Horus/The Nature Conservancy, Curitiba, Brazil.

Pimentel, D., 2014. Biological invasions: economic and environmental costs of alien plant, animal, and microbe species. CRC Press, New York.

Prates, E.J., Guerra, R.F., 2005. Parental care and sexual interactions in Mongolian gerbils (*Meriones unguiculatus*) during the postpartum estrus. Behav. Process. 70, 104–112.

Quin, D.G., Riek, A., Green, S., Smith, A.P., Geiser, F., 2010. Seasonally constant field metabolic rates in free-ranging sugar gliders (*Petaurus breviceps*). Comp. Biochem. Phys. A 155, 336–340.

Ratz, H., 2000. Movements by stoats (*Mustela erminea*) and ferrets (*M. furo*) through rank grass of yellow‐eyed penguin (*Megadyptes antipodes*) breeding areas. J. Zool. 27(1), 57-69.

Reid, F., Helgen, K., 2008a. *Mustela erminea*. The IUCN Red List of Threatened Species, 2008. http://dx.doi.org/10.2305/IUCN.UK.2008.RLTS.T29674A9523078.en. (accessed 09.02.17).

Reid, F., Helgen, K., 2008b. *Mephitis mephitis*. The IUCN Red List of Threatened Species, 2008. http://dx.doi.org/10.2305/IUCN.UK.2008.RLTS.T41635A10524738.en. (accessed 09.02.17).

Remonti, L., Balestrieri, A., Prigioni, C., 2007. Role of fruits in the diet of small mustelids (*Mustela sp*.) from the western Italian Alps. Eur. J. Wildl. Res. 53, 35–39.

Riber, A.B., 2006. Habitat use and behaviour of European hedgehog *Erinaceus europaeus* in a Danish rural area. Acta Theriol. 51(4), 363–371.

Rondinini, C. 2007. Hedgehogs and moon rats. The Encyclopedia of Mammals. Oxford University Press . Oxford Reference Online Edition, Oxford. <http://www.oxfordreference.com.proxy.lib.umich.edu/views/ENTRY.html?subview=Main&entry=t227.e65>. (accessed 03.02.17).

Rosatte, R., Power, M., MacInnes, C., Campbell, J., 1992. Trap-vaccinate-release and oral vaccination for rabies control in urban skunks, raccoons and foxes. J. Wildl. Dis. 28, 562-571.

Samson, C., Raymond, M., 1995. [Daily activity pattern and time budget of stoats (*Mustela erminea*) during summer in southern Quebec](http://apps.webofknowledge.com/full_record.do?product=UA&search_mode=GeneralSearch&qid=1&SID=4FSScoXXjv8nMCJlgKv&page=11&doc=535). Mammal 59(4), 501-510.

Scheibler, E., Liu, W., Weinandy, R., Gattermann, R., 2005. Burrow systems of the Mongolian gerbil (*Meriones unguiculatus* Milne Edwards,, 1867). Mammal Biol. 71(3), 178-182.

Scheibler, E., Wollnik, F., 2009. Interspecific contact affects phase response and activity in Desert hamsters. Physiol. Behav. 98, 288–295.

Schultze-Westrum, T.G., 1969. Social communications by chemical signals in flying phalangers (*Petaurus breviceps papuanus*), in: Ptaffmann, C. (Ed.) Olfaction and taste. Rockefeller University Press, New York, pp. 268-277.

Smith, M.S., 1973. *Petaurus breviceps*. Mamm. Species 30, 1-5.

Smith, A.P., 1982. Diet and feeding strategies of the marsupial Sugar Glider in temperate Australia. J. Anim. Ecol. 51(1), 149-166.

Smith, D.H.V., Wilson, D.J., Moller, H., Murphy, E.C., van Heezik, Y., 2007. Selection of alpine grasslands over beech forest by stoats (*Mustela erminea*) in montane southern New Zealand. New Zeal. J. Ecol. 31(1), 88-97.

Stojanovic, D., Webb, M.H., Alderman, R., Porfirio, L.L., Heinsohn, R., 2014. Discovery of a novel predator reveals extreme but highly variable mortality for an endangered migratory bird: Divers. Distrib. 20, 1200–1207.

Stuart, P., Zintl, A., de Waal, T., Mulcahy, G., Hawkins, C., Lawton, C., 2013. Investigating the role of wild carnivores in the epidemiology of bovine neosporosis. Parasitol. 140, 296–302.

Taylor, B.D., Rohweder, D., 2013. Radio-tracking three Sugar Gliders using forested highway median strips at Bongil Bongil National Park, north-east New South Wales. Ecol. Manage. Res. 14(3), 228-230.

Tsytsulina, K., Formozov, N., Shar, S., Lkhagvasuren, D., Sheftel, B., 2008. *Tamias sibiricus*. The IUCN Red List of Threatened Species. http://dx.doi.org/10.2305/IUCN.UK.2008.RLTS.T21360A9275610.en. (accessed 09.04.17).

Veale, A.J., Clout, M.N., Gleeson, D.M., 2012. Genetic population assignment reveals a long-distance incursion to an island by a stoat (*Mustela erminea*). Biol. Invasions 14, 735–742.

Yi, X., Wang, Z., Liu, C., Liu, G., 2015. Seed trait and rodent species determine seed dispersal and predation: evidences from semi-natural enclosures. iForest 8, 207-213.

Zhong, W.Q., Zhou, Q.Q., Sun, C.L., 1985. The basic characteristics of the rodent pests on the pasture in Inner Mongolia and its ecological strategies of controlling. Acta Theriol. Sinica 5, 242–249.
